# Supplementary material for: Caveolin-1 dolines form a distinct and rapid caveolae-independent mechanoadaptation system
Source: PubMed Central journal article supplement (PMC9859760; doi:10.1038/s41556-022-01034-3), 2022-12-21

# From figure 7

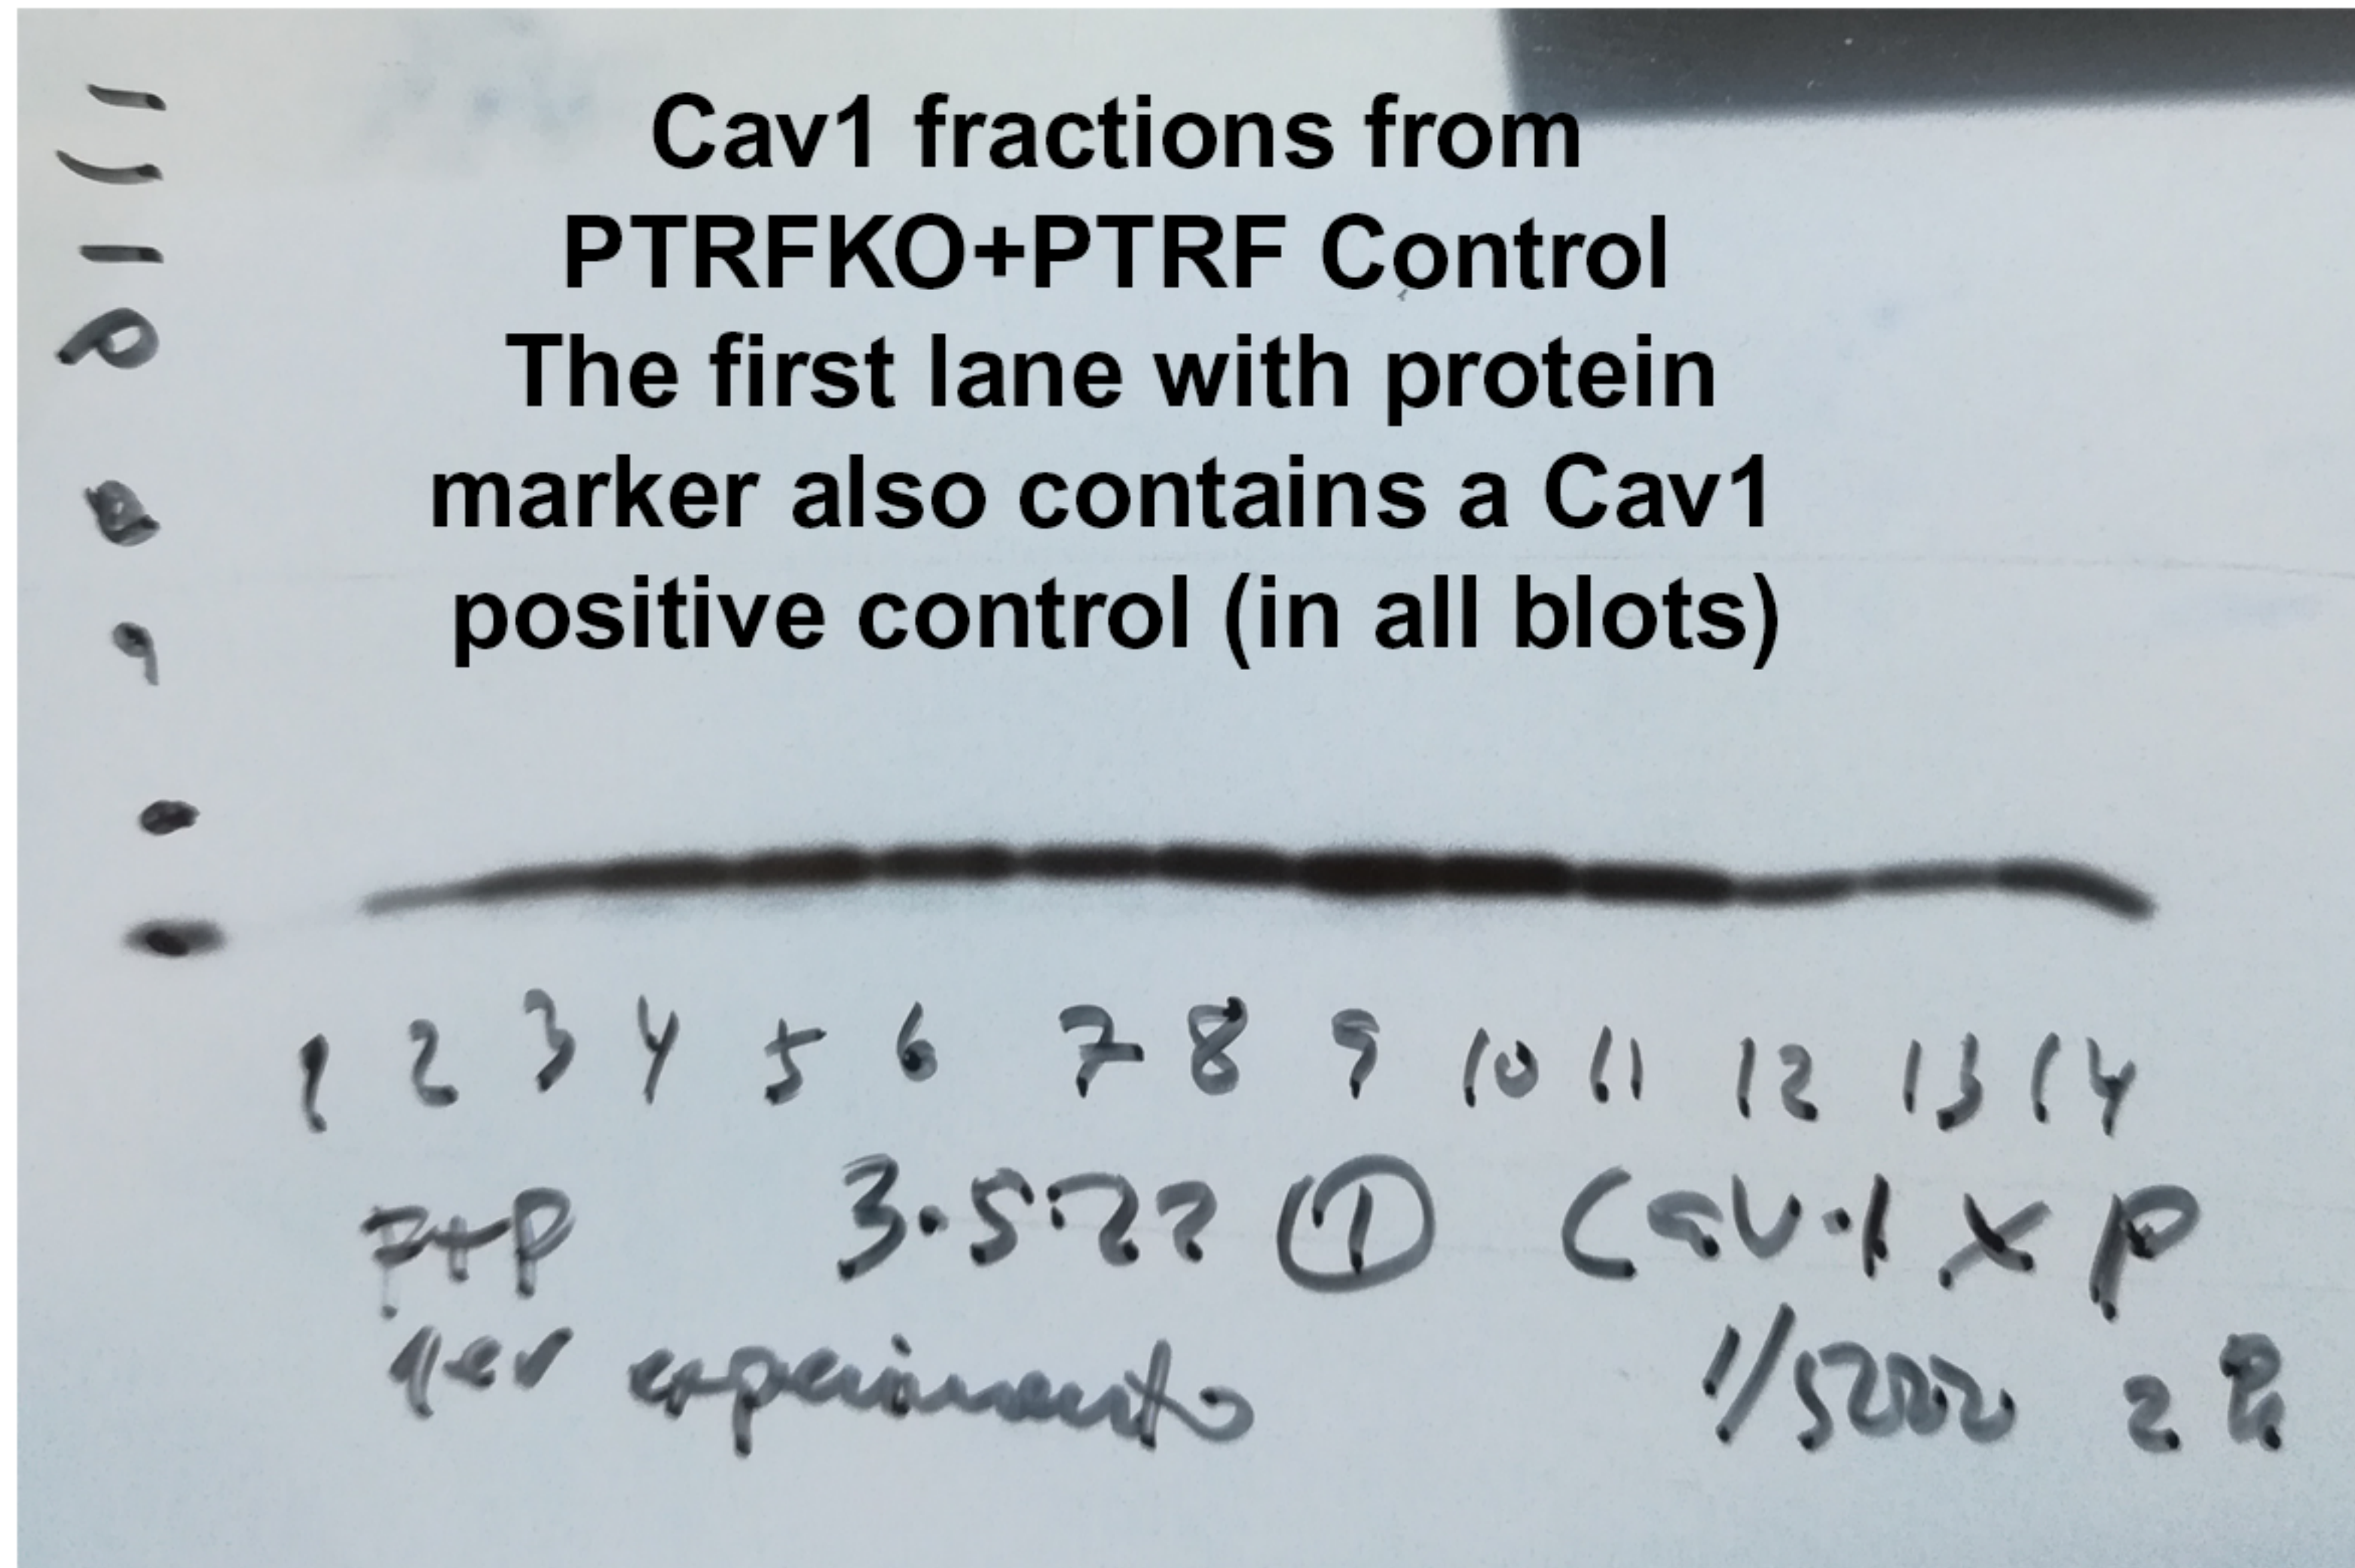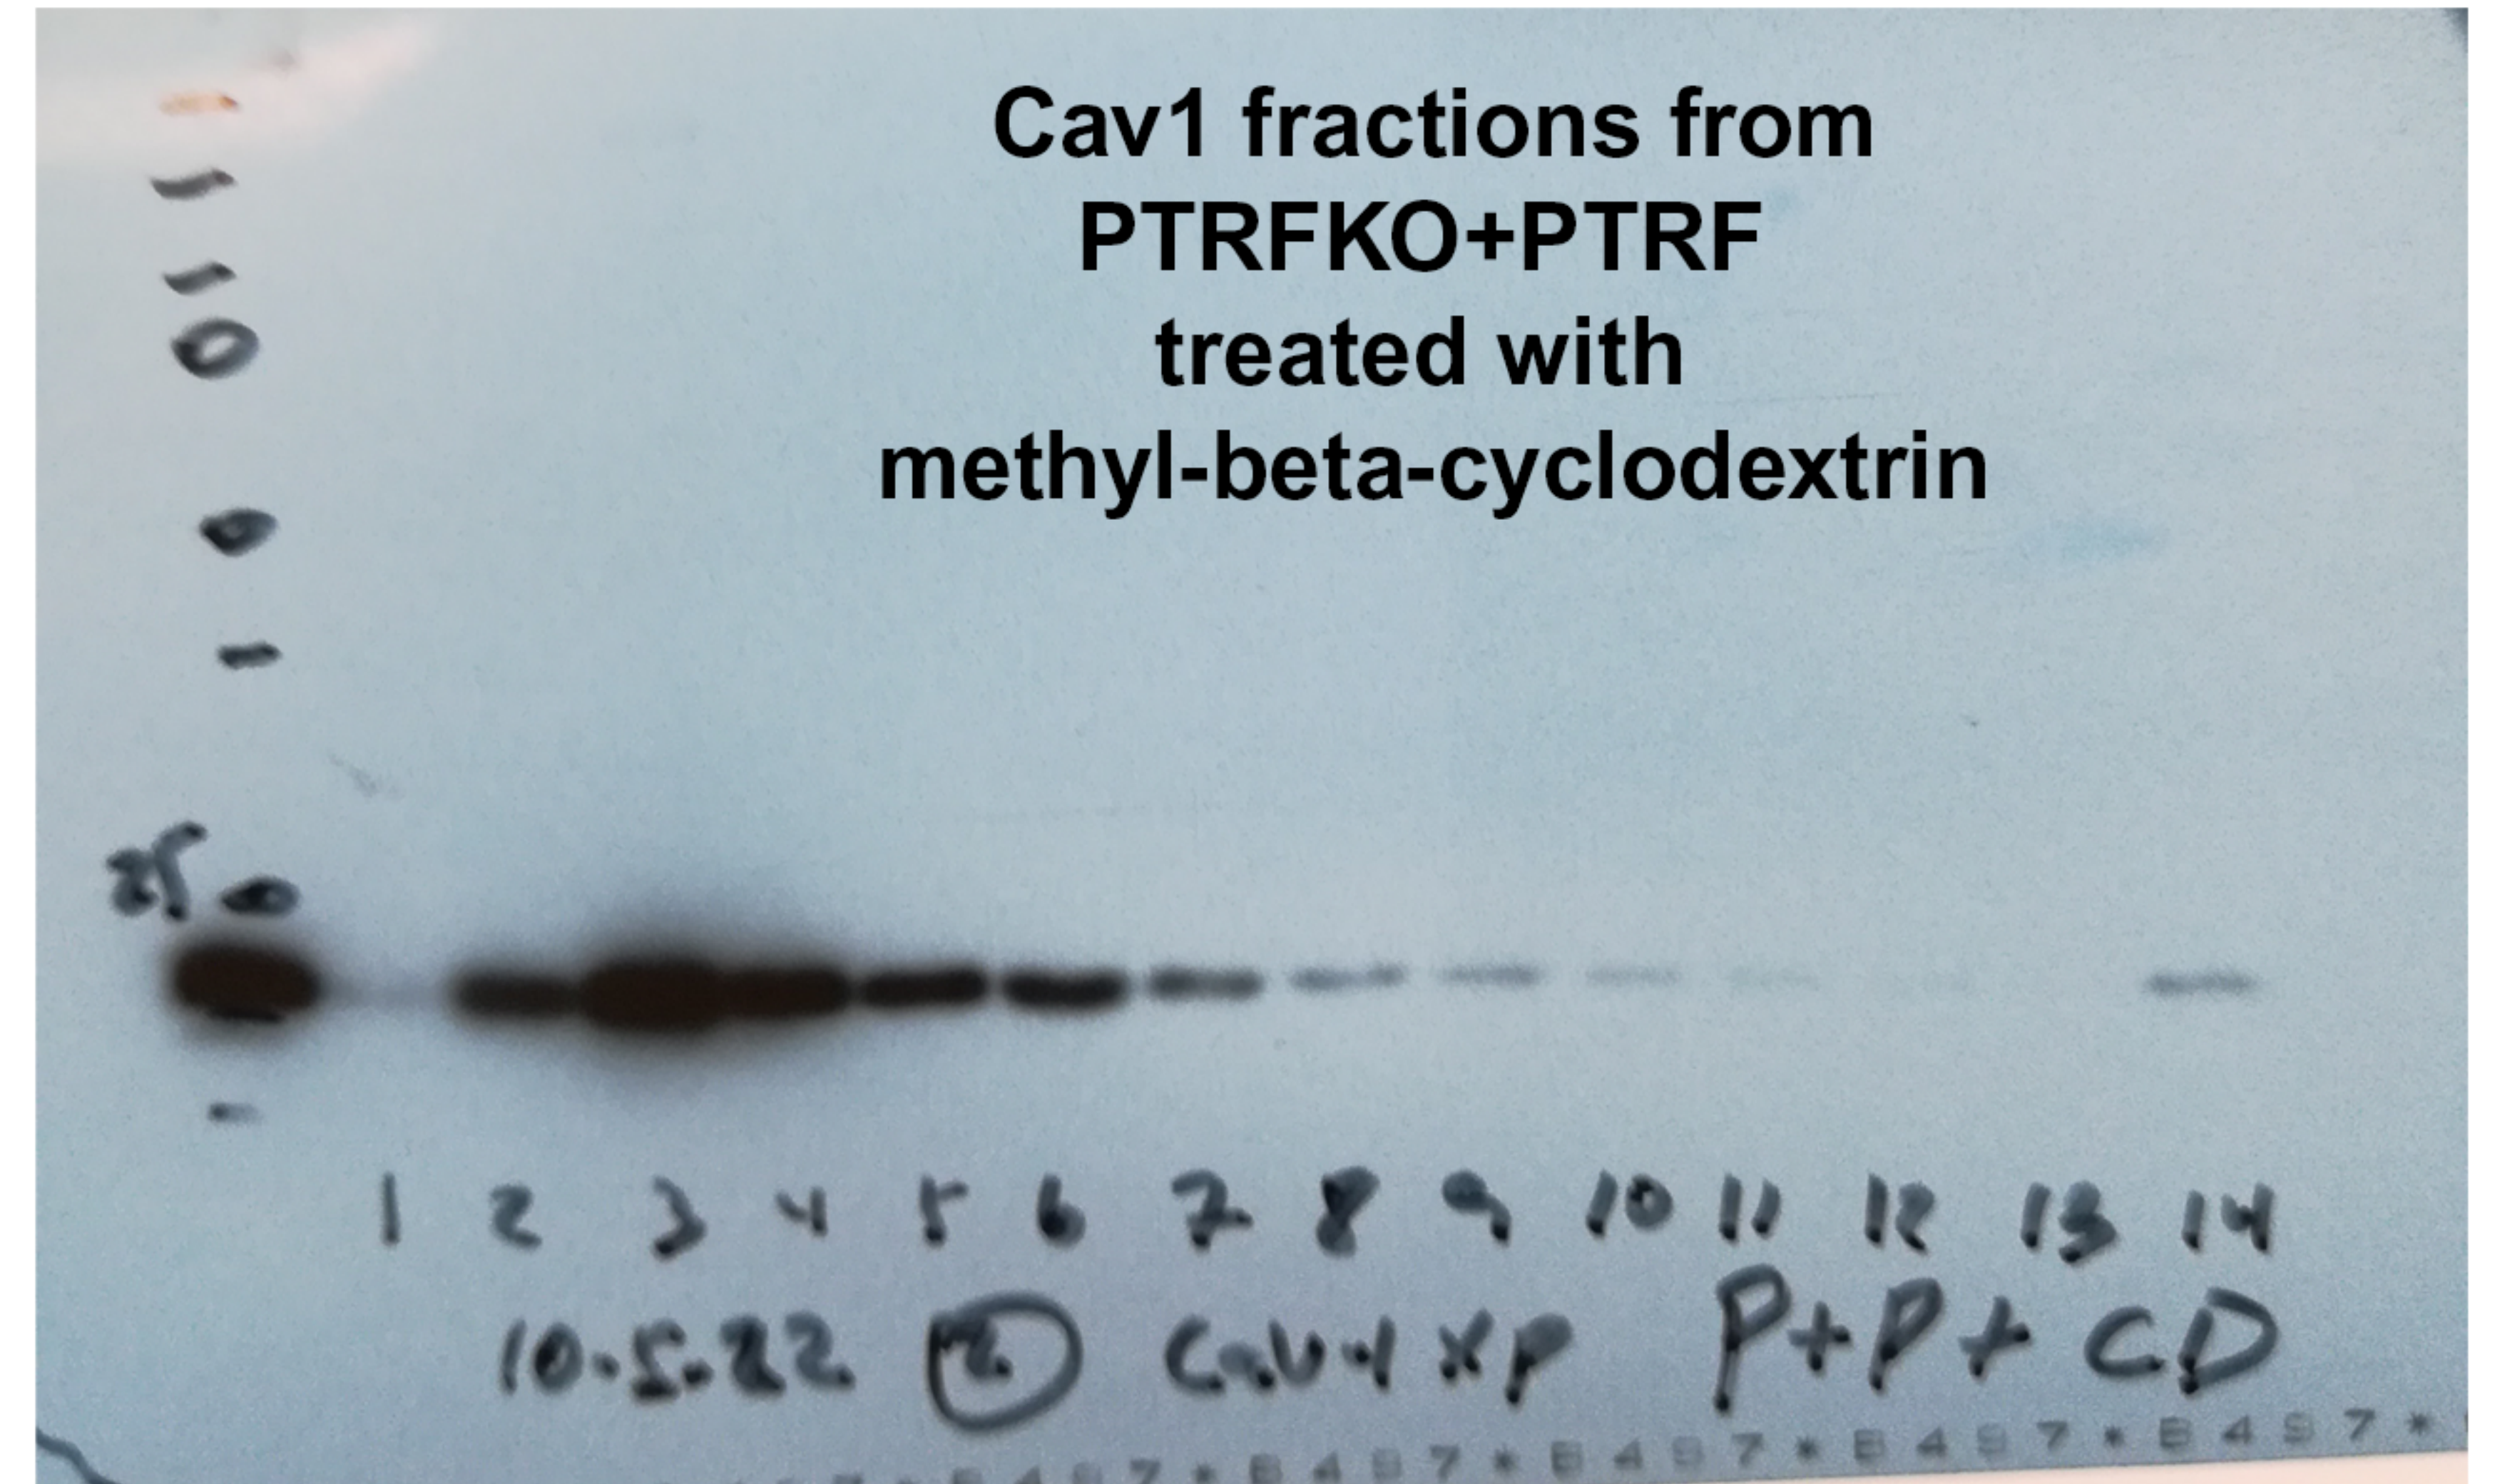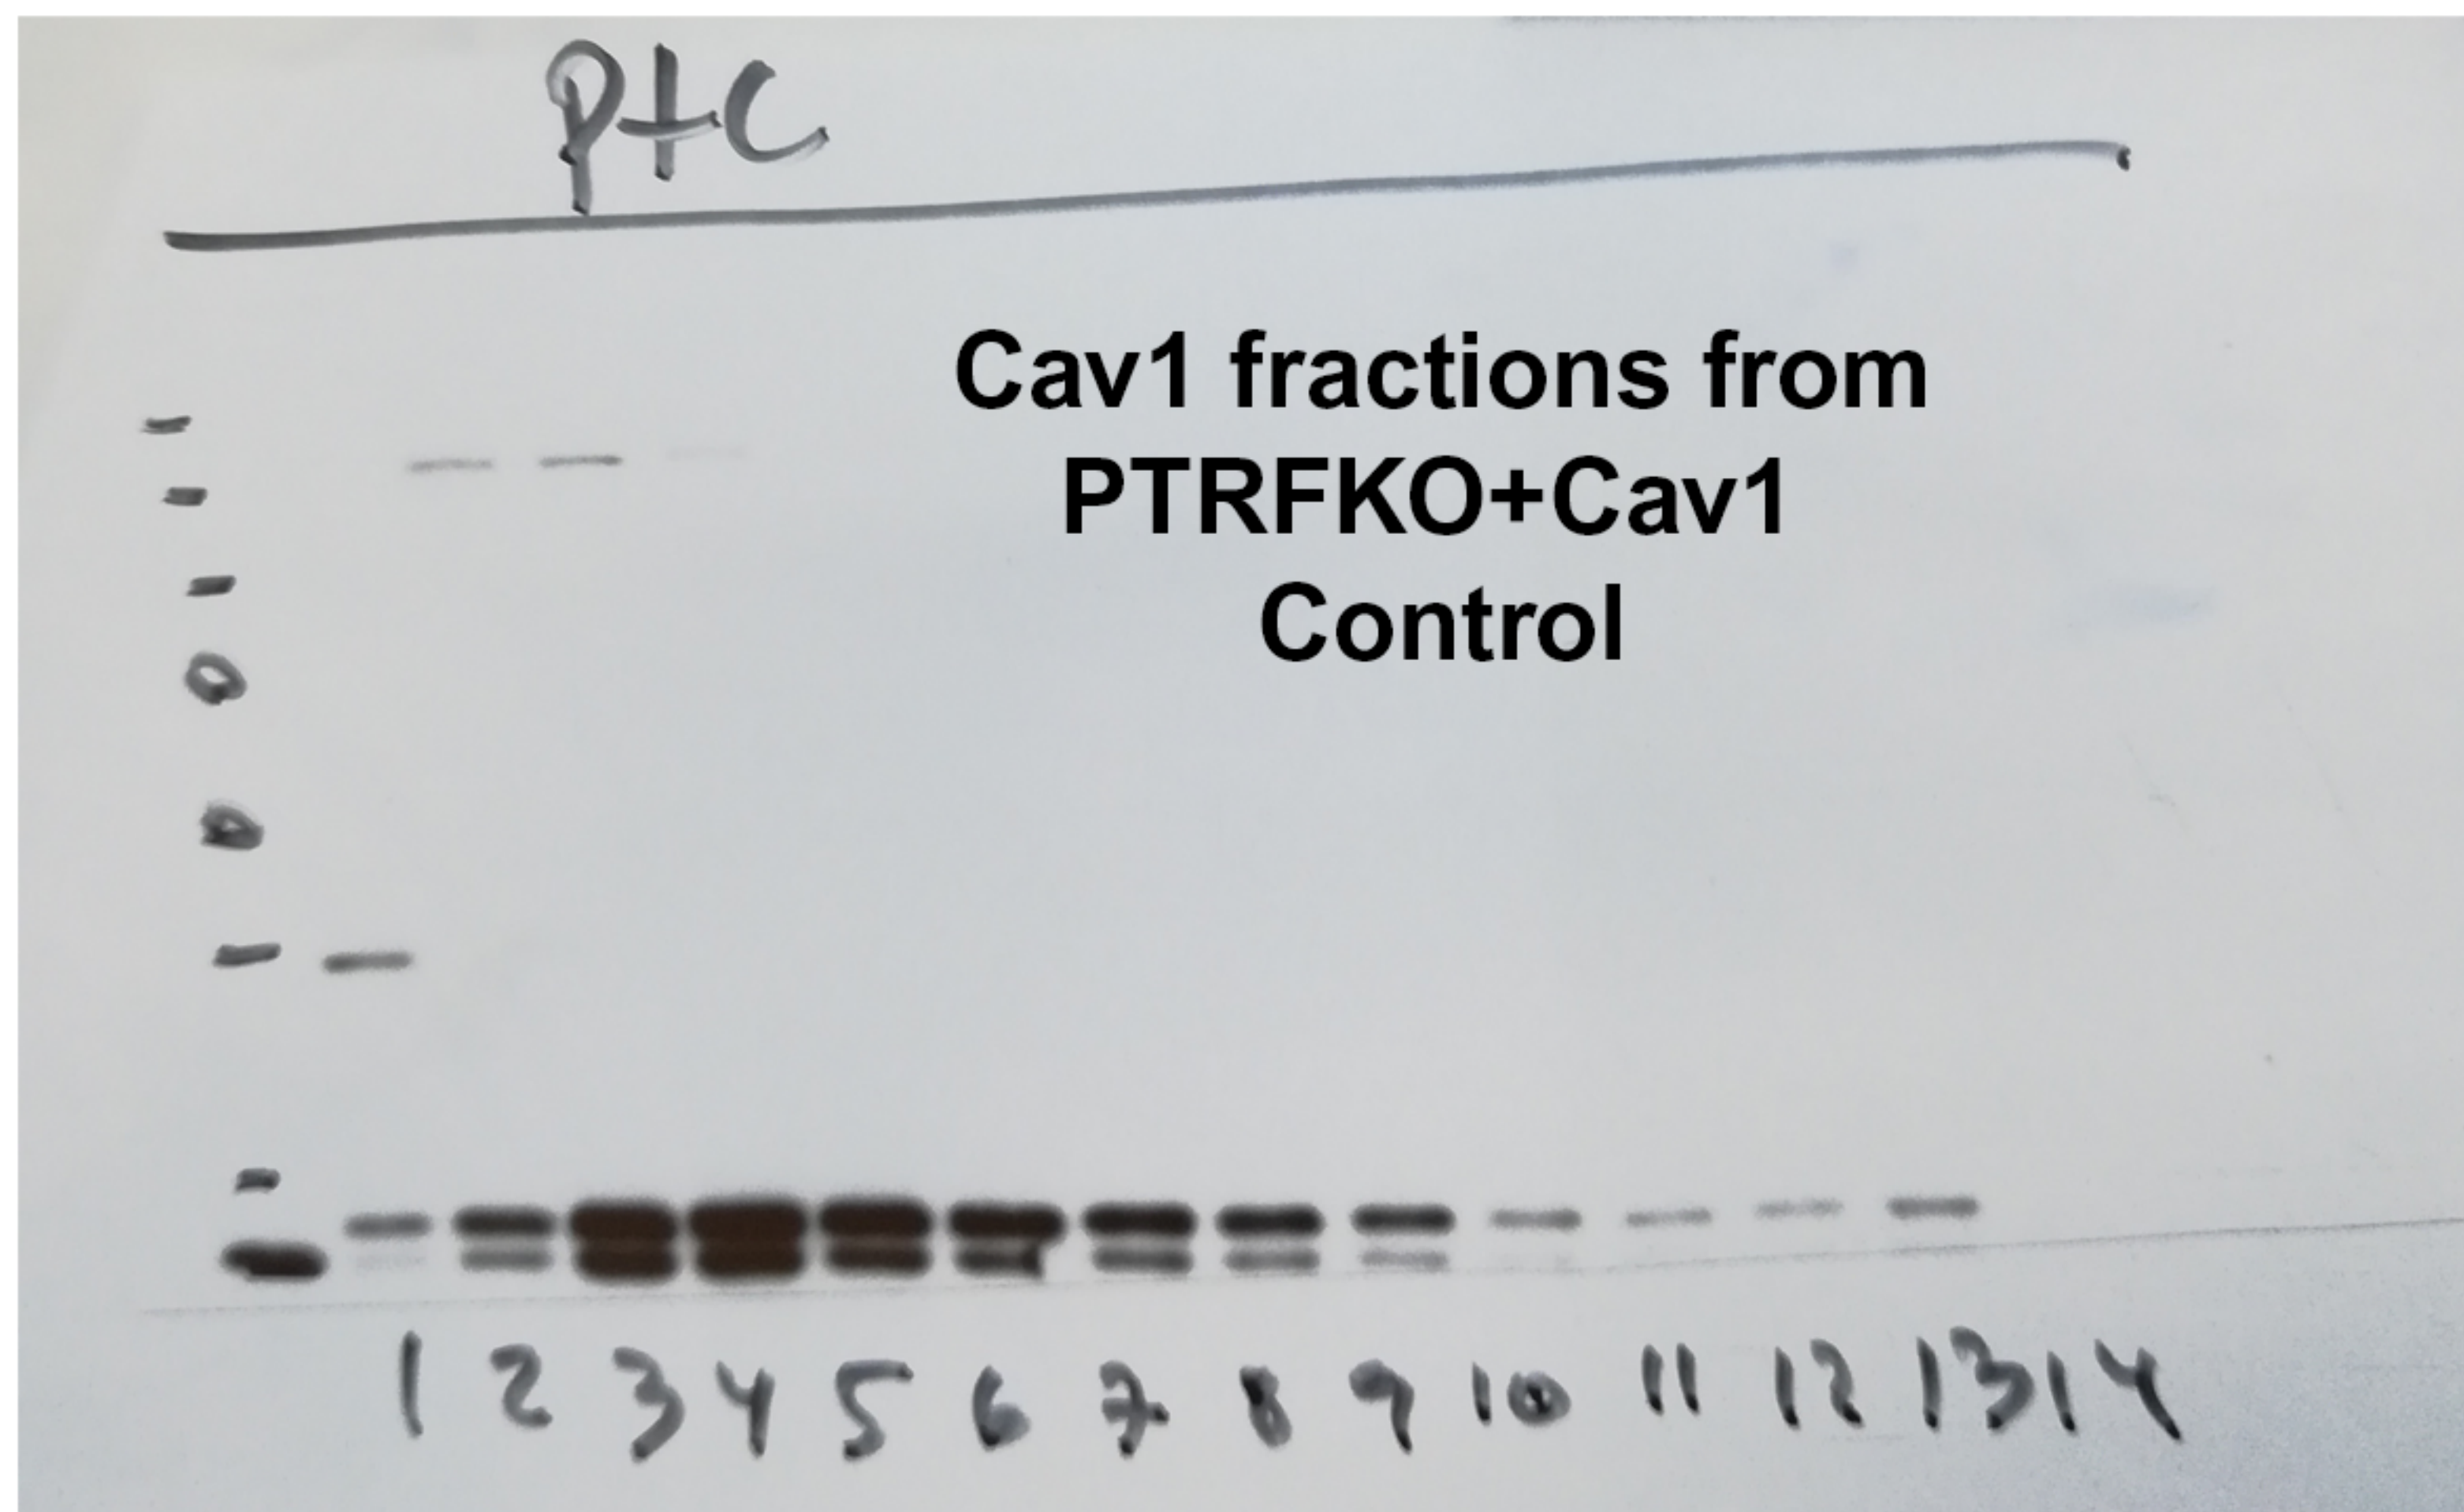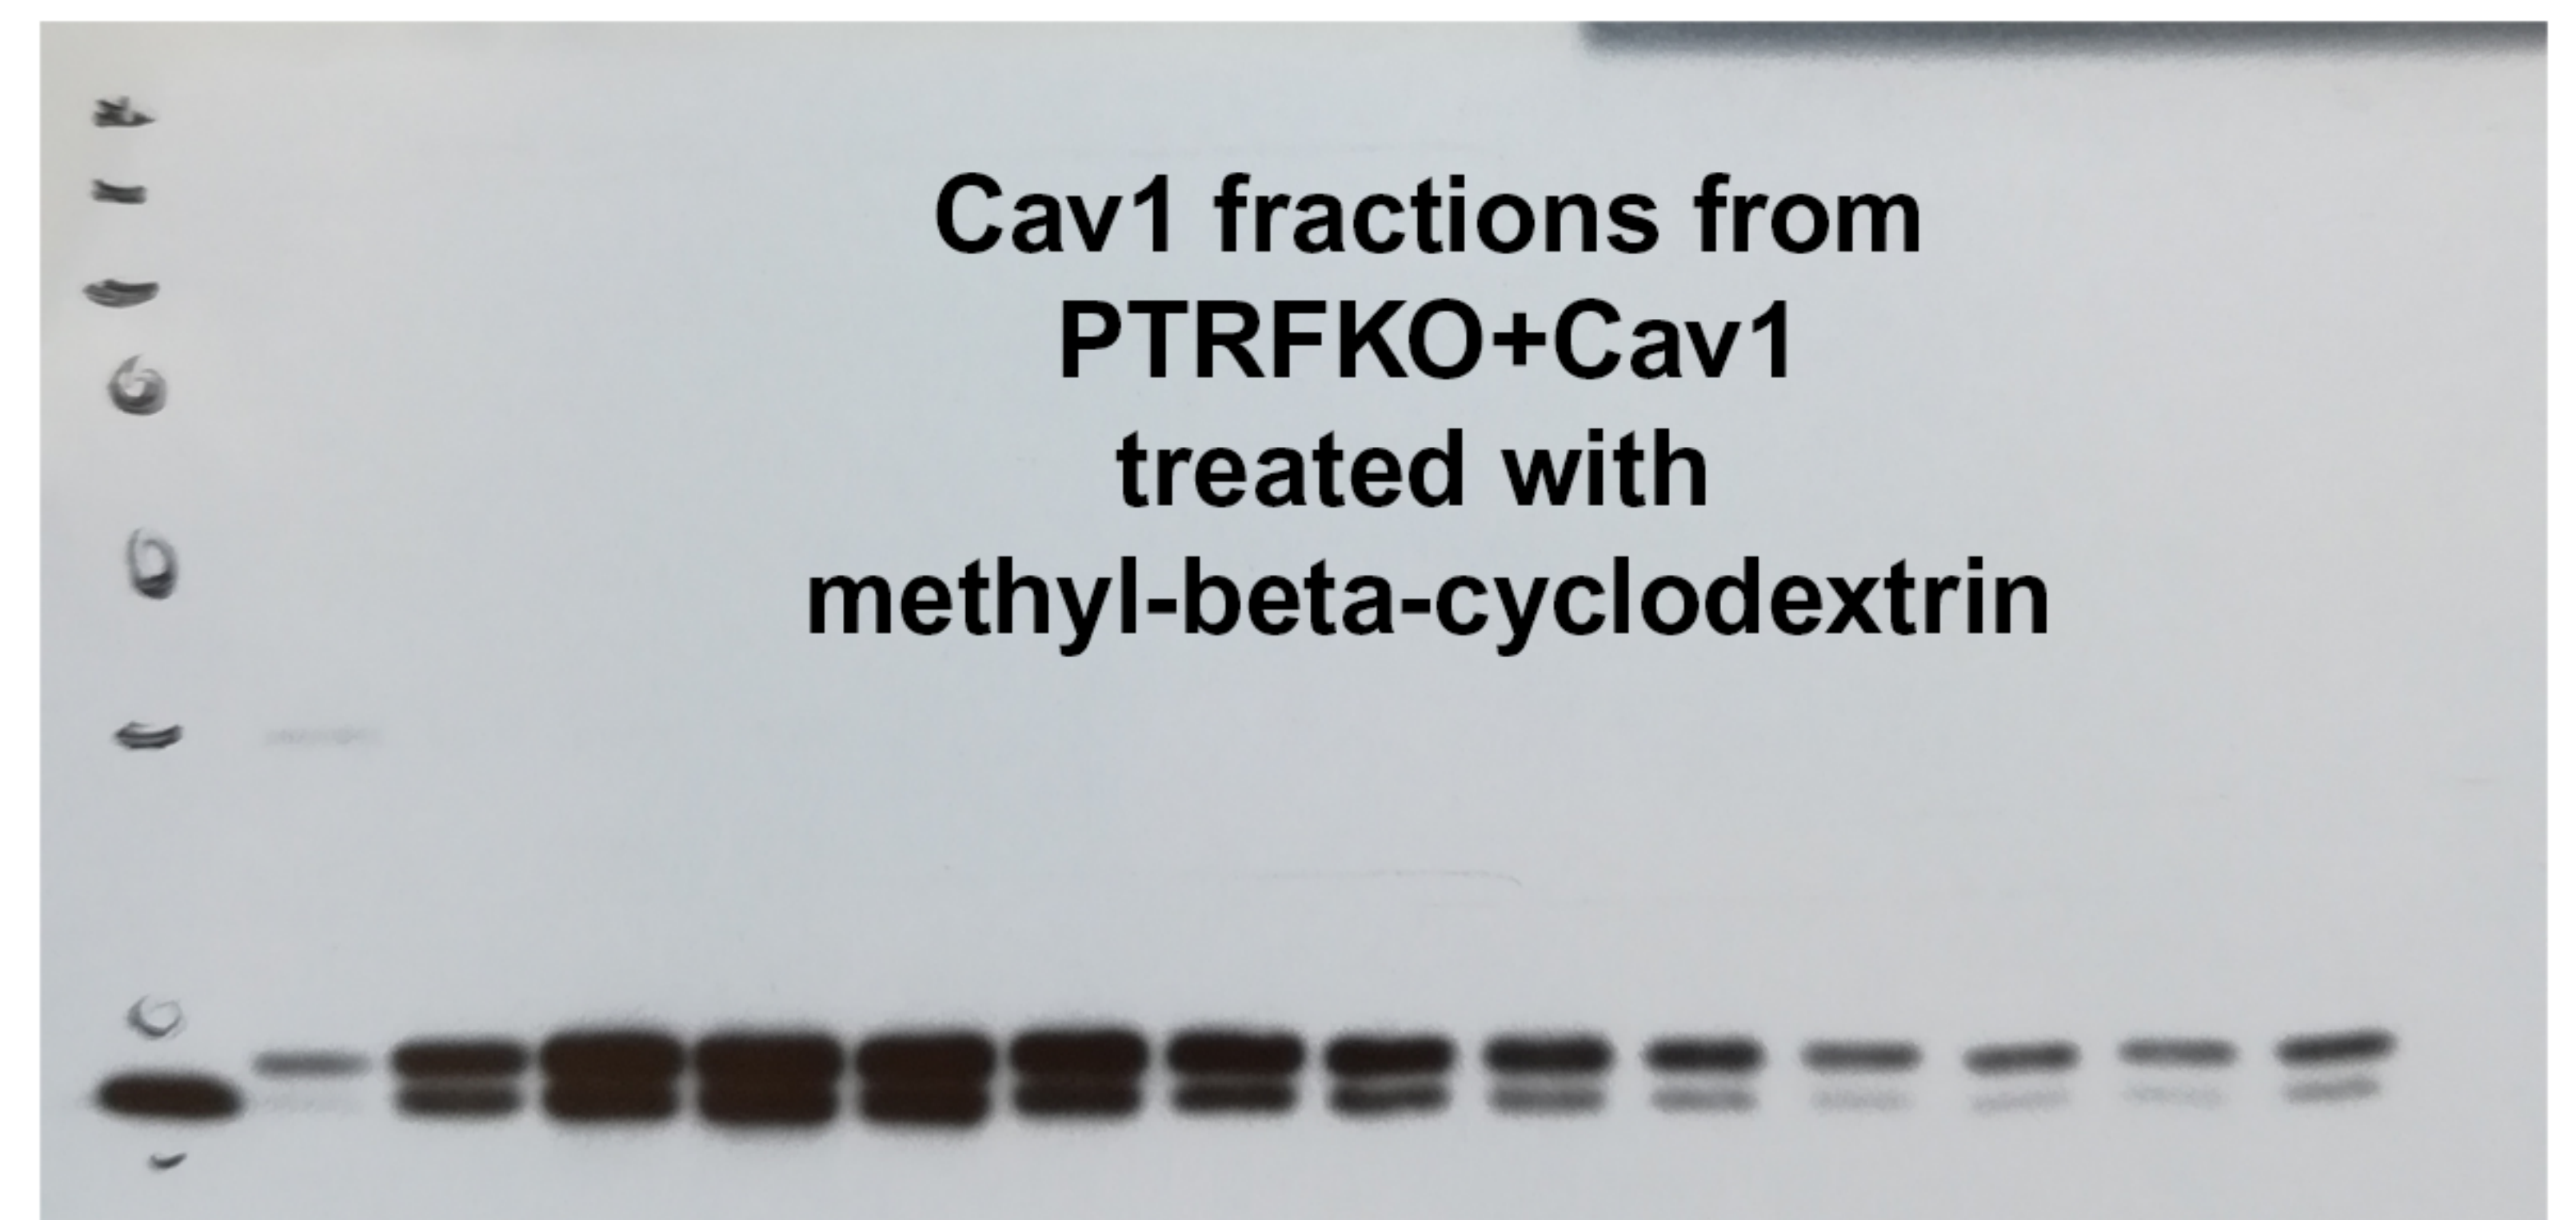

Supplement: 41556_2022_1034_MOESM25_ESM.pdf [file 41556_2022_1034_MOESM25_ESM.pdf]
